# Diversity of Murine Norovirus Strains Isolated from Asymptomatic Mice of Different Genetic Backgrounds within a Single U.S. Research Institute

Elyssa L. Barron<sup>1</sup>, Stanislav V. Sosnovtsev<sup>1</sup>, Karin Bok<sup>1</sup>, Victor Prikhodko<sup>1</sup>, Carlos Sandoval-Jaime<sup>1</sup>, Crystal R. Rhodes<sup>1</sup>, Kim Hasenkrug<sup>2</sup>, Aaron B. Carmody<sup>2</sup>, Jerrold M. Ward<sup>3</sup>, Kathy Perdue<sup>3</sup>, Kim Y. Green<sup>1\*</sup>

**1** Laboratory of Infectious Diseases, National Institute of Allergy and Infectious Diseases, National Institutes of Health, Department of Health and Human Services, Bethesda, Maryland, United States of America, **2** Retrovirus Immunology Section, National Institute of Allergy and Infectious Diseases, National Institutes of Health, Department of Health and Human Services, Hamilton, Montana, United States of America, **3** Comparative Medicine Branch, National Institute of Allergy and Infectious Diseases, National Institutes of Health, Department of Health and Human Services, Bethesda, Maryland, United States of America

## Abstract

Antibody prevalence studies in laboratory mice indicate that murine norovirus (MNV) infections are common, but the natural history of these viruses has not been fully established. This study examined the extent of genetic diversity of murine noroviruses isolated from healthy laboratory mice housed in multiple animal facilities within a single, large research institute—the National Institute of Allergy and Infectious Diseases of the National Institutes of Health (NIAID-NIH) in Bethesda, Maryland, U.S. Ten distinct murine norovirus strains were isolated from various tissues and feces of asymptomatic wild type sentinel mice as well as asymptomatic immunodeficient (RAG 2<sup>-/-</sup>) mice. The NIH MNV isolates showed little cytopathic effect in permissive RAW264.7 cells in early passages, but all isolates examined could be adapted to efficient growth in cell culture by serial passage. The viruses, although closely related in genome sequence, were distinguishable from each other according to facility location, likely due to the introduction of new viruses into each facility from separate sources or vendors at different times. Our study indicates that the murine noroviruses are widespread in these animal facilities, despite rigorous guidelines for animal care and maintenance.

**Citation:** Barron EL, Sosnovtsev SV, Bok K, Prikhodko V, Sandoval-Jaime C, et al. (2011) Diversity of Murine Norovirus Strains Isolated from Asymptomatic Mice of Different Genetic Backgrounds within a Single U.S. Research Institute. PLoS ONE 6(6): e21435. doi:10.1371/journal.pone.0021435

**Editor:** Karol Sestak, Tulane University, United States of America

**Received:** March 16, 2011; **Accepted:** May 27, 2011; **Published:** June 28, 2011

This is an open-access article, free of all copyright, and may be freely reproduced, distributed, transmitted, modified, built upon, or otherwise used by anyone for any lawful purpose. The work is made available under the Creative Commons CC0 public domain dedication.

**Funding:** This study was supported by the intramural research program of the National Institute of Allergy and Infectious Diseases. The funders had no role in study design, data collection and analysis, decision to publish, or preparation of the manuscript.

**Competing Interests:** The authors have declared that no competing interests exist.

\* E-mail: kgreen@niaid.nih.gov

## Introduction

Noroviruses, members of the virus family *Caliciviridae*, are ubiquitous enteric viruses found in a broad range of animal species, including mice [1]. In humans, they are associated with nausea, vomiting, diarrhea, and fever that characteristically last approximately 24–48 hours. They are transmitted via person-to-person contact, or by exposure to contaminated food or water. Outbreaks often occur in settings such as nursing homes and cruise ships, where close contact allows for easy spread of the virus. Long-term illness and shedding of noroviruses have been reported in immunocompromised individuals [2]. The approximately 7.6 kb positive-sense, single-stranded RNA genome of norovirus is organized into three major open-reading frames (ORFs): ORF1 encodes a large polypeptide that is cleaved into nonstructural precursors and proteins involved in viral replication; ORF2 encodes the major capsid protein, VP1; and ORF3 encodes a minor structural protein of the virion, VP2 [3,4,5,6]. In murine norovirus (MNV) strains [7], an additional ORF4 has been described that encodes a protein of unknown function [8]. Noroviruses have been divided into five distinct genogroups (GI–GV) [9], with human pathogens belonging to GI, GII, and GIV.

The bovine and murine noroviruses detected thus far belong to GIII and GV, respectively. Although genetically distinct from the human noroviruses, the murine noroviruses have emerged as an important model in the study of norovirus biology and replication because, in contrast to the human pathogens, an efficient cell culture system is available [10,11].

The discovery of the first MNV strain, designated MNV-1, in mice within a U.S. university research facility [7] led to the development of antibody detection assays that quickly showed serologic evidence for a widespread distribution of this virus in laboratory mice [12]. Although most mice infected with MNV appear healthy, the viruses have been associated with severe systemic illness and death in certain genetically engineered mice lacking an intact innate immune system such as STAT1<sup>-/-</sup> mice [7]. The MNV strains characterized thus far have formed a highly related single genotype within GV, whether associated with asymptomatic infection or disease [8], but recombination events between viruses have been proposed [13]. At our research institute, the National Institute of Allergy and Infectious Diseases (NIAID) of the National Institutes of Health (NIH), U.S., serologic evidence for MNV infection was found in several “sentinel” mice in various animal rooms [14,15], which prompted us to examine

the molecular epidemiology of MNV within our animal facilities. We isolated murine noroviruses in cell culture from ten NIH mice and the genomes of these viruses were sequenced. The MNV strains characterized within each NIAID animal facility were distinct from those in other facilities of the institute, suggesting the introduction of the virus into each facility from a separate source. However, the NIH MNV strains showed marked overall genetic relatedness with other murine norovirus strains detected thus far.

## Results

By serologic screening of sentinel mice housed in several NIAID animal facilities, we found evidence initially for norovirus infection, and in addition, we were able to detect the virus by RT-PCR in representative mice [15]. This study focused on the further characterization of MNV strains isolated from mice housed in three of the animal facilities (Table 1). While all facilities housed mice from the same commercial vendors, each facility also housed mice received from separate non-commercial sources. Ten MNV strains (designated as the NIH strains) were isolated following passage in RAW264.7 cells, and their full-length genomes were sequenced. The genomes were similar in length (7382 or 7383 nt) and organized into three major open reading frames (ORFs): ORF1 (nt 6–5069) encoding the nonstructural polyprotein, ORF2 (nt 5056–6681) encoding the major capsid protein, VP1, and ORF3 (nt 6681–7307) encoding the minor capsid protein, VP2 (Figure 1). In addition, the genomes contained a predicted conserved fourth ORF (ORF4) spanning nt 5069–5710 that would encode a putative protein of 23.6 kDa [8].

Comparison of the nucleotide sequences showed a close genetic relationship among the NIH MNV strains, with a range of 87.2–99.7% overall nucleotide identity. The nucleotide identities with the prototype strain, MNV-1, ranged from 87.4–89.1%, and with all other full-length MNV sequences available in GenBank, the identities ranged from 87.4–99%. Comparison of the deduced amino acid sequences among the NIH strains showed that the proteinase was the most highly conserved protein (approximately 97% similarity), while the VP1 (major capsid protein) showed the most variability (as low as 89.6% similarity). Analysis of the MNV-1 VP1 capsid protein showed that the shell (S) region of the capsid protein (amino acid residues 49 to 218) was 100% conserved among the NIH MNV strains while the protruding (P) region (amino acids 229 to 537) was most variable, consistent with data

reported for other highly-related murine noroviruses [8]. The P2 domain (amino acids 278–415) within the P region is exposed predominantly on the surface of the virion and has been proposed as the major site of immune pressure and receptor binding for calicivirus virions [16]. Consistent with this, passage of the virulent MNV-1 strain in cell culture yielded virus in which lysine was changed to glutamic acid at position 296 in the P2 domain. This single amino acid substitution resulted in loss of virulence of the MNV-1 strain in STAT1-deficient mice (17). Of interest, a glutamic acid residue at position 296 was conserved in the cell-culture adapted NIH MNV strains in this study, as well as the NIH-2409 virus prior to adaptation (data not shown) [17]. A leucine residue at position 386 involved in the formation of a neutralization epitope in MNV-1 [18] was conserved in the P2 domain of the NIH MNV strains (data not shown).

The replication strategy for murine norovirus involves the proteolytic processing of the ORF1 polyprotein into several nonstructural proteins by the virus-encoded cysteine proteinase (Pro). The proteinase mediates five cleavages at dipeptide sites <sup>341</sup>E/G<sup>342</sup>, <sup>705</sup>Q/N<sup>706</sup>, <sup>870</sup>E/G<sup>871</sup>, <sup>994</sup>E/A<sup>995</sup>, and <sup>1177</sup>Q/G<sup>1178</sup> to produce six proteins: NS1-2 (Nterm), NS3 (NTPase), NS4 (p18), NS5 (VPg), NS6 (Pro) and NS7 (Pol) [6]. Alignment of the deduced ORF1 polyprotein sequences of the NIH MNV strains with that of MNV-1 showed that these dipeptide cleavage sites were conserved in location, but with some minor variation in the P1' positions at amino acid residues 706 and 871 (Figure 1).

A phylogenetic analysis of the complete genome sequences of the NIH MNV strains was performed to compare their relatedness with that of other murine noroviruses (Figure 2). The NIH strains clustered with Genogroup V murine noroviruses, but did not share complete identity with other strains reported thus far. Eight of the strains formed a distinct monophyletic group (NIH- 4421, 2747, 2409, 2411, 2410, 2750, 4428, and 4431, with nucleotide variation not exceeding 1%). Strain NIH-A114 did not cluster with other viruses and formed a distinct branch. Strain NIH-D220 clustered most closely with a phylogenetic group that included several Charles River (CR) and Washington University (WU) strains. The three genetic groupings of the NIH strains corresponded to their isolation from three distinct animal facilities in the institute at different times (Table 1).

A previous study had identified amino acid substitutions in the NS4 and VP1 proteins that emerged during cell-culture passage of

**Table 1.** Murine norovirus strains isolated from NIH mice.

| Strain Designation          | NIH Facility | Mouse         | Specimen         | Passage (P)      |
|-----------------------------|--------------|---------------|------------------|------------------|
|                             |              | Strain        | Source for Virus | Number*          |
| Mu/NoV/GV/NIH- 2409/2005/US | B14          | RAG2-/-       | MLN              | P0, P1, P2, 3xPP |
| Mu/NoV/GV/NIH -2410/2005/US | B14          | RAG2-/-       | MLN              | P3               |
| Mu/NoV/GV/NIH- 2411/2005/US | B14          | RAG2-/-       | MLN              | P3               |
| Mu/NoV/GV/NIH- 2747/2005/US | B14          | RAG2-/-       | MLN              | P3               |
| Mu/NoV/GV/NIH- 2750/2005/US | B14          | RAG2-/-       | MLN              | P3               |
| Mu/NoV/GV/NIH -4421/2005/US | B14          | RAG2-/-       | Duodenum         | P3               |
| Mu/NoV/GV/NIH -4428/2005/US | B14          | RAG2-/-       | Duodenum         | P3               |
| Mu/NoV/GV/NIH-4431/2005/US  | B14          | RAG2-/-       | Duodenum         | P4               |
| Mu/NoV/GV/NIH -A114/2006/US | TB           | Swiss Webster | Fecal            | P7               |
| Mu/NoV/GV/NIH-D220/2007/US  | B50          | Swiss Webster | Fecal            | P2               |

\*Passage (P) number of virus in RAW264.7 cells at which genome sequence was determined as described in text.  
doi:10.1371/journal.pone.0021435.t001



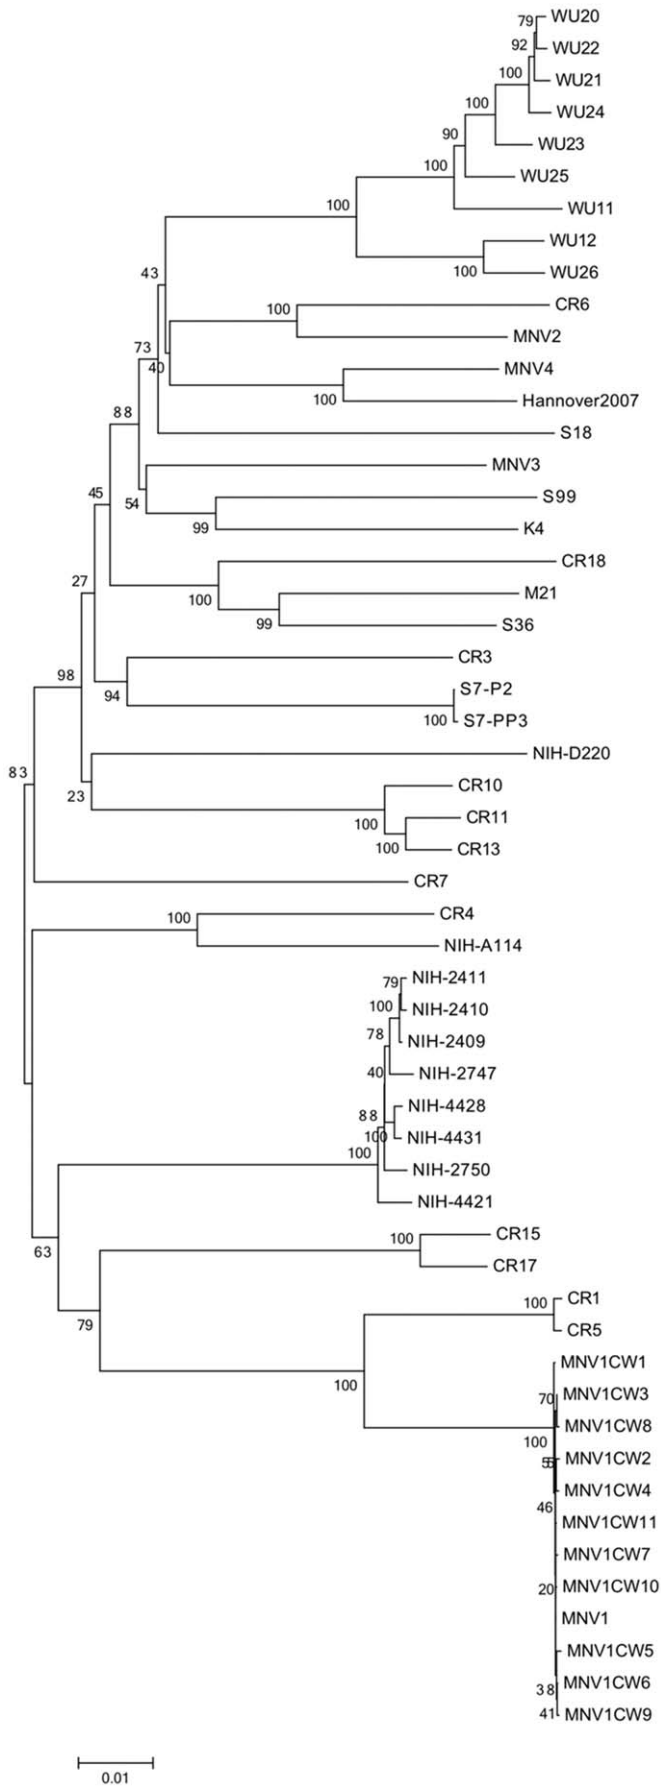

**Figure 2. Phylogenetic analysis of NIH MNV viral genomes in comparison with representative viruses previously published.** Phylogenetic relationships were inferred using Neighbor-joining method, with the evolutionary distances computed by the Tamura-Nei method. The statistical support for tree nodes was evaluated by bootstrap analysis (500 replicates) and values higher than 65 are shown above the corresponding branches. The strains in this analysis and their GenBank accession numbers are shown in the Supplemental Table (Table S1). doi:10.1371/journal.pone.0021435.g002

demonstrated one silent change (nt 6770) during passage and plaque purification.

It is not clear when MNV was introduced into laboratory mice, and whether such strains circulate in wild mice. Recent studies of experimental mouse models found that the presence of MNV did not affect the immune response and recovery from Friend retrovirus [19], or the development of adaptive immunity to vaccinia virus and influenza virus [20]. Murine norovirus did not affect experimental outcomes from murine cytomegalovirus infection, although there was a decreased CD8 T cell response [21]. However, the presence of MNV did increase the length of time have an effect on parvovirus was shedding in Balb/c mice [22] and concerns have been raised for its effect in other murine disease models [23,24,25]. Sequence analysis of the new MNV NIH strains described in this study contributes to the growing database of genomic norovirus sequences. Continued analysis of the molecular epidemiology of these viruses should give insight into their natural history and evolution in mice.

## Materials and Methods

### Cells and viruses

The murine macrophage-like cell line RAW264.7 was obtained from American Type Culture Collection (Manassas, VA). The cells were grown in Dulbecco's Modified Eagle's Medium (DMEM) supplemented with penicillin (250 units/ml), streptomycin (250 µg/ml), 1% glutamine, and 10% heat-inactivated fetal calf serum. Murine norovirus strain MNV-1 [7] was a gift of Dr. Herbert Virgin, Washington University, Saint Louis, MO.

Mesenteric lymph node (MLN), hepatic, spleen or duodenal tissues and fecal samples were collected from mice housed in three different NIAID animal facilities on the NIH, Bethesda, Maryland campus [15] (Table 1) under a protocol approved by the NIAID Animal Care and Use Committee. Sentinel mice in these facilities were routinely monitored for serological evidence of infection with several agents, including MNV, and all three facilities reported MNV antibody-positive sentinel mice. Fifty µl of the filtered tissue or fecal suspension was added to a RAW264.7 cell monolayer seeded in one well of a 6-well tissue culture plate (Costar, Corning Inc., Corning, NY), after which the cells were incubated for 5–7 days at 37°C. Cells were then frozen and thawed and 50 µl of the resultant suspension was used to infect a new RAW264.7 cell monolayer. The material was passed between 2 and 7 times, depending on the amount of associated CPE. Fluid from the final passage was collected and subjected to three rounds of plaque-purification. A plaque from the third purification was isolated and amplified to serve as a virus stock for sequence analysis of the complete genome.

### Tissue culture adaptation of MNV strain NIH-2409

An MLN homogenate from mouse 2409 was added to RAW264.7 cells in two wells of a 6-well plate. The material from one well was passed three times in RAW264.7 cells as described above. The second well was fixed with methanol and the presence of MNV antigen after 7 days was examined by immunofluorescence assay as described below. Following pass 3 (P3), the isolated MNV strain, designated NIH-2409, was plaque-purified three times (3XPP). Briefly, a plaque was removed from the monolayer

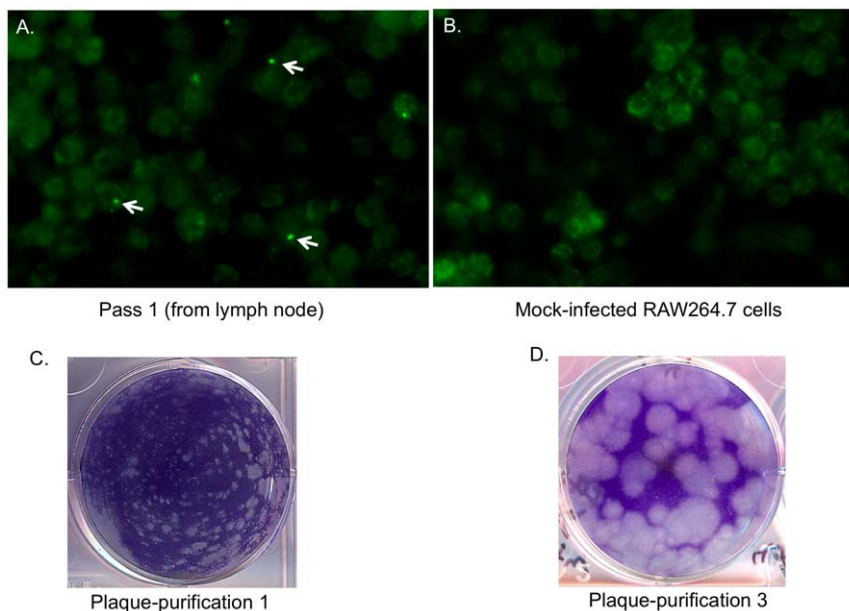

**Figure 3. Serial passage of MNV NIH-2409 in RAW264.7 cells.** **A.** Immunofluorescence assay of RAW264.7 cells inoculated directly with a lymph node homogenate from mouse. Medium was removed after 7 days, cells were fixed with methanol, and viral antigen expression was detected with anti-MNV-1 VP1 serum. Representative positive MNV antigen expression is indicated by white arrows. **B.** Mock-infected RAW264.7 cells incubated with same serum. **C.** First plaque purification of NIH MNV-2409 following P3 in RAW264.7 cells as described in Material and Methods. **D.** Plaque morphology after two additional plaque purifications in RAW264.7 cells (3XPP virus stock). doi:10.1371/journal.pone.0021435.g003

**Table 2.** Sequence analysis of viral genomes during passage of MNV NIH-2409 in cell culture.

| Open Reading Frame (ORF) | Protein | Genomic Position of Nucleotide | Position of Amino Acid | Amino Acid | 2409 Lymph Node (Pass 0) | 2409 Pass 1    | 2409 Pass 2    | 2409 Pass 3 after plaque purification (3xPP) |
|--------------------------|---------|--------------------------------|------------------------|------------|--------------------------|----------------|----------------|----------------------------------------------|
| ORF1                     | NS1-2   | 188                            | 61                     | Ala        | <u>GCA</u>               | <u>GCA/GCG</u> | <u>GCG/GCA</u> | <u>GCA</u>                                   |
|                          | NS1-2   | 320                            | 105                    | Ala        | <u>GCC</u>               | <u>GCT</u>     | <u>GCT</u>     | <u>GCC</u>                                   |
|                          | NS1-2   | 629                            | 208                    | Pro        | <u>CCC</u>               | <u>CCT</u>     | <u>CCT</u>     | <u>CCC</u>                                   |
|                          | NS3     | 1469                           | 488                    | Arg        | <u>CGT/CGC</u>           | <u>CGC/CGT</u> | <u>CGC/CGT</u> | <u>CGC</u>                                   |
|                          | NS3     | 1487                           | 494                    | Arg        | <u>CGG/CGA</u>           | <u>CGA/CGG</u> | <u>CGA/CGG</u> | <u>CGA</u>                                   |
|                          | NS3     | 1817                           | 604                    | Thr        | <u>ACT/ACC</u>           | <u>ACC/ACT</u> | <u>ACC/ACT</u> | <u>ACC</u>                                   |
|                          | NS3     | 2081                           | 692                    | Val        | <u>GTC/GTT</u>           | <u>GTT/GTC</u> | <u>GTC/GTT</u> | <u>GTC</u>                                   |
|                          | NS4     | 2166                           | 721                    | Ser→Ala    | <u>TCC/GCC</u>           | <u>GCC/TCC</u> | <u>TCC/GCC</u> | <u>GCC</u>                                   |
|                          | NS4     | 2495                           | 830                    | Tyr        | <u>TAC</u>               | <u>TAT/TAC</u> | <u>TAC/TAT</u> | <u>TAT</u>                                   |
|                          | NS4     | 2531                           | 842                    | Tyr        | <u>TAC</u>               | <u>TAT/TAC</u> | <u>TAC/TAT</u> | <u>TAC</u>                                   |
|                          | NS4     | 2543                           | 846                    | Gly        | <u>GGT/GGC</u>           | <u>GGT/GGC</u> | <u>GGT/GGC</u> | <u>GGT</u>                                   |
|                          | NS7     | 3803                           | 1266                   | Val        | <u>GTT/GTC</u>           | <u>GTC/GTT</u> | <u>GTC/GTG</u> | <u>GTC</u>                                   |
|                          | NS7     | 3809                           | 1268                   | Asp        | <u>GAT/GAC</u>           | <u>GAT/GAC</u> | <u>GAT/GAC</u> | <u>GAC</u>                                   |
|                          | NS7     | 4151                           | 1382                   | Phe        | <u>TTC/TTT</u>           | <u>TTC/TTT</u> | <u>TTT/TTC</u> | <u>TTC</u>                                   |
|                          | ORF2    | VP1                            | 5481                   | 142        | Thr                      | <u>ACA</u>     | <u>ACG/ACA</u> | <u>ACA/ACG</u>                               |
| VP1                      |         | 5892                           | 279                    | Thr        | <u>ACG/ACC</u>           | <u>ACG</u>     | <u>ACG</u>     | <u>ACG</u>                                   |
| VP1                      |         | 5904                           | 283                    | Gly        | <u>GGC/GGT</u>           | <u>GGC</u>     | <u>GGC</u>     | <u>GGC</u>                                   |
| VP1                      |         | 6550                           | 499                    | Leu        | <u>TTG</u>               | <u>CTG/TTG</u> | <u>TTG/CTG</u> | <u>CTG</u>                                   |

Note: Positions with variation in sequence are underlined.  
doi:10.1371/journal.pone.0021435.t002

with a pipette tip, diluted in medium, and then subjected directly to a second plaque-purification. A second plaque was removed, diluted in medium, and subjected directly to a third plaque purification. The final isolated plaque was amplified in cells and the virus stock was designated 3XPP. The consensus sequence of the genome of the virus present in the original tissue (P0) was determined and compared to that of the virus obtained at P1, P2, and after three rounds of plaque purification (3XPP).

### RNA extraction

Tissue samples were placed in 0.5 ml sterile, cold phosphate buffered saline (PBS) and disrupted on ice with either a Dounce homogenizer or an electric high shear tissue homogenizer (Omni International, Kennesaw, GA). Tissue suspensions were then stored at  $-70^{\circ}\text{C}$ . Fecal pellets were added to PBS at a concentration of approximately 10% w/v in a sterile microfuge tube, followed by vortexing. The solid material in the feces was pelleted by low-speed centrifugation (10,000 rpm  $\times$  10 minutes) in a tabletop microfuge and the clarified fecal suspension was filtered and transferred to a sterile microfuge tube. Viral RNA was extracted with the QIAamp Viral RNA mini kit (Qiagen, Valencia, CA) using a 100  $\mu\text{l}$  aliquot of either the fecal or tissue suspension. The extracted RNA was eluted in 50  $\mu\text{l}$  of RNase-free water and stored at  $-70^{\circ}\text{C}$ .

### Sequence analysis of RT-PCR products

The purified RNA was amplified by RT-PCR with the One Step RT-PCR kit (Invitrogen, Carlsbad, CA) in a strategy that produced seven amplicons that were gel-purified and sequenced directly (primers for RT-PCR shown in Table 3). Sequencing was performed with the BigDye Terminator v.3.1 cycle Sequencing Ready Reaction kit in an ABI 3100 Automated sequencer (Applied Biosystems, Foster City, CA). The precise ends of the

genome were determined with the 5' and 3' Rapid Amplification of cDNA Ends (RACE) systems from Invitrogen.

### Phylogenetic analysis

Multiple sequence alignments were generated with the ClustalW algorithm in the MacVector, Inc. (Cary, NC) software package. Phylogenetic relationships were inferred using the Neighbor-joining method [26], with the evolutionary distances computed by the Tamura-Nei method [27]. The statistical support for tree nodes was evaluated by bootstrap analysis (500 replicates) [28]. Evolutionary analyses were conducted with the MEGA software package [29].

### qRT-PCR detection assay

A real-time qRT-PCR assay was adapted for the detection of MNV RNA [19,30]. Briefly, a forward primer 5'-AATC-TATGCGCCTGGTTTGC-3' and a reverse primer 5'-CTCAT-CACCCGGGCTGTT-3' were employed to amplify a region of the genome corresponding to nucleotides (nt) 5585–5646. A Taqman probe with the sequence 5'-CACGCCACTCCGC-3' (corresponding to nt 5613–5625 of the MNV NIH-2409 genome) was generated with FAM dye linked to the 5'-end and BHQ dye at the 3'-end. Five  $\mu\text{l}$  of RNA were added to an RT-PCR mix (Brilliant II qRT-PCR core reagent kit, Stratagene, La Jolla, CA). The reaction was then incubated at  $45^{\circ}\text{C}$  for 30 min,  $95^{\circ}\text{C}$  for 10 min, followed by 45 cycles at  $95^{\circ}\text{C}$  for 30 sec,  $50^{\circ}\text{C}$  for 1 min and  $72^{\circ}\text{C}$  for 30 sec in an ABI 7900 HT instrument (Applied Biosystems). Each sample was tested in duplicate and an appropriate triplicate standard curve for absolute quantification was included in each run.

### Immunofluorescence

RAW264.7 cells were infected with virus and incubated 7 days before fixation with cold methanol (100%). The methanol was removed and the cells were rinsed with PBS, pH 7.4. Hyperim-

**Table 3.** Primer pairs used in the amplification of NIH murine norovirus genomes.

| Region 1                  |                                                                                             |
|---------------------------|---------------------------------------------------------------------------------------------|
| MNV-1 BsmBI/T7pro/5'-endF | ATATATATATCGTCTCAAATTCGTCTCACTGGTAATACGACTCACTATAGTAAAATGAGGATGGCAACGCCATCTTCTGCGCCCTGTGCGC |
| MNV-1 n1139R              | GCAAATTTGCCCATCTCTTGGGGCGCCTTCAGGGCC                                                        |
| Region 2                  |                                                                                             |
| NIH MNV-1n922F            | GCATAGTCAATGCCCTGATTCTTCTTGCTGAGC                                                           |
| NIH MNV-1n2615R (VPg)     | CCCCGGCCTCTCTTGTCTTGCCCTTCTGCTC                                                             |
| Region 3                  |                                                                                             |
| NIH MNV-1n2392F           | GTGTCAGGAGGATCAAAGAGGCTCGCCTTCGCTGC                                                         |
| NIH MNV-1n3734R           | CGCGTGGCTCTGAATAGGGCTTGAGCTGGTCTCGC                                                         |
| Region 4                  |                                                                                             |
| NIH MNV-1n3394F           | CAGGTGACTGTGGCTGCCCTATGTCTACAAGAAGGGAAAC                                                    |
| NIH MNV-1n4840R           | GCAGGGCCATCAATTGGGAGGGTCTCTGAGCGTGTC                                                        |
| Region 5                  |                                                                                             |
| NIH MNV-1n4450F           | GCCCCTGCACCACGAGCTGAACAGCTTGG                                                               |
| NIH MNV-1n5722R           | CACGGGCAAGTCGACCATCCGGTAGATGGTCTCTC                                                         |
| Region 6                  |                                                                                             |
| NIH MNV-1 n5332F          | GCCCACCTCTCAGCCATGTACACGGCTGGGTTGGGAAC                                                      |
| NIH MNV-1n6733R           | CGCCTGAAGGTTTTGGACATTTGAGATGGAATTGC                                                         |
| Region 7                  |                                                                                             |
| NIH-MNV n6427F            | GTCTCTGGTTCGCGTCTAACCGGTTACCGTGCAGTCC                                                       |
| NIH-MNV 3'/polyA R        | TTTAAATGCATCTAAATACTACCAAAGAAAAGAG                                                          |

doi:10.1371/journal.pone.0021435.t003

murine serum raised in a guinea pig against recombinant MNV-1 VP1 [14] was added at a 1:100 dilution and incubated at 37°C for one hour. The wells were then rinsed three times with PBS, and affinity purified goat antibodies specific for guinea pig immunoglobulin G (IgG) (ICN Biomedicals, Aurora, OH) and conjugated to fluorescein isothiocyanate were added at a 1:20 dilution to detect binding of the primary antibody.

## Supporting Information

**Table S1** Murine norovirus strains included in phylogenetic analysis and their GenBank accession numbers are shown. (XLSX)

## References

- Green KY (2007) *Caliciviridae: The Noroviruses*; D M K, P H, editors. Philadelphia: Lippincott Williams & Wilkins. pp 949–979.
- Kaufman SS, Chatterjee NK, Fuschino ME, Morse DL, Morotti RA, et al. (2005) Characteristics of human calicivirus enteritis in intestinal transplant recipients. *J Pediatr Gastroenterol Nutr* 40: 328–333.
- Glass PJ, White LJ, Ball JM, Leparc-Goffart I, Hardy ME, et al. (2000) Norwalk virus open reading frame 3 encodes a minor structural protein. *J Virol* 74: 6581–6591.
- Jiang X, Wang M, Wang K, Estes MK (1993) Sequence and genomic organization of Norwalk virus. *Virology* 195: 51–61.
- Lambden PR, Caul O, Ashley C, Clarke IN Sequence and genome organization of a human small round structured (Norwalk-like) virus.
- Sosnovtsev SV, Belliot G, Chang KO, Prikhodko VG, Thackray LB, et al. (2006) Cleavage map and proteolytic processing of the murine norovirus nonstructural polyprotein in infected cells. *J Virol* 80: 7816–7831.
- Karst SM, Wobus CE, Lay M, Davidson J, Virgin HWt (2003) STAT1-dependent innate immunity to a Norwalk-like virus. *Science* 299: 1575–1578.
- Thackray LB, Wobus CE, Chachu KA, Liu B, Alegre ER, et al. (2007) Murine noroviruses comprising a single genogroup exhibit biological diversity despite limited sequence divergence. *J Virol* 81: 10460–10473.
- Zheng DP, Ando T, Fankhauser RL, Beard RS, Glass RI, et al. (2006) Norovirus classification and proposed strain nomenclature. *Virology* 346: 312–323.
- Wobus CE, Karst SM, Thackray LB, Chang KO, Sosnovtsev SV, et al. (2004) Replication of Norovirus in cell culture reveals a tropism for dendritic cells and macrophages. *PLoS Biol* 2: e432.
- Wobus CE, Thackray LB, Virgin HWt (2006) Murine norovirus: a model system to study norovirus biology and pathogenesis. *J Virol* 80: 5104–5112.
- Hsu CC, Wobus CE, Steffen EK, Riley LK, Livingston RS (2005) Development of a microsphere-based serologic multiplexed fluorescent immunoassay and a reverse transcriptase PCR assay to detect murine norovirus 1 infection in mice. *Clin Diagn Lab Immunol* 12: 1145–1151.
- Muller B, Klemm U, Mas Marques A, Schreier E (2007) Genetic diversity and recombination of murine noroviruses in immunocompromised mice. *Arch Virol* 152: 1709–1719.
- Ward JM, Wobus CE, Thackray LB, Erexson CR, Faucette LJ, et al. (2006) Pathology of immunodeficient mice with naturally occurring murine norovirus infection. *Toxicol Pathol* 34: 708–715.
- Perdue KA, Green KY, Copeland M, Barron E, Mandel M, et al. (2007) Naturally occurring murine norovirus infection in a large research institution. *J Am Assoc Lab Anim Sci* 46: 39–45.
- Tan M, Hegde RS, Jiang X (2004) The P domain of norovirus capsid protein forms dimer and binds to histo-blood group antigen receptors. *J Virol* 78: 6233–6242.
- Bailey D, Thackray LB, Goodfellow IG (2008) A single amino acid substitution in the murine norovirus capsid protein is sufficient for attenuation in vivo. *J Virol* 82: 7725–7728.
- Lochridge VP, Hardy ME (2007) A single-amino-acid substitution in the P2 domain of VP1 of murine norovirus is sufficient for escape from antibody neutralization. *J Virol* 81: 12316–12322.

## Acknowledgments

We would like to thank Tanaji Mitra (Laboratory of Infectious Diseases, NIAID) for technical support.

## Author Contributions

Conceived and designed the experiments: ELB SVS KB JMW KP KYG. Performed the experiments: ELB SVS KB VP CS-J CRR JMW KP KYG. Analyzed the data: ELB SVS KB JMW KP KYG. Contributed reagents/materials/analysis tools: KH ABC. Wrote the paper: ELB KYG. Supervision of veterinary technical staff: KP.

19. Ammann CG, Messer RJ, Varvel K, Debuyscher BL, Lacasse RA, et al. (2009) Effects of acute and chronic murine norovirus infections on immune responses and recovery from Friend retrovirus infection. *J Virol* 83: 13037–13041.
20. Hensley SE, Pinto AK, Hickman HD, Kastenmayer RJ, Bennink JR, et al. (2009) Murine norovirus infection has no significant effect on adaptive immunity to vaccinia virus or influenza A virus. *J Virol* 83: 7357–7360.
21. Doom CM, Turula HM, Hill AB (2009) Investigation of the impact of the common animal facility contaminant murine norovirus on experimental murine cytomegalovirus infection. *Virology* 392: 153–161.
22. Compton SR, Paturzo FX, Macy JD (2010) Effect of murine norovirus infection on mouse parvovirus infection. *J Am Assoc Lab Anim Sci* 49: 11–21.
23. Achard M, Mahler M, Neumann D, Zschemisch NH, Janus LM, et al. (2009) Impact of Murine Norovirus On a Mouse Model of IBD. *Gastroenterology* 136: A706–A706.
24. Lencioni KC, Seamons A, Treuting PM, Maggio-Price L, Brabb T (2008) Murine norovirus: an intercurrent variable in a mouse model of bacteria-induced inflammatory bowel disease. *Comp Med* 58: 522–533.
25. Paik J, Fierce Y, Drivdahl R, Treuting PM, Seamons A, et al. (2010) Effects of murine norovirus infection on a mouse model of diet-induced obesity and insulin resistance. *Comp Med* 60: 189–195.
26. Saitou N, Nei M (1987) The neighbor-joining method: a new method for reconstructing phylogenetic trees. *Mol Biol Evol* 4: 406–425.
27. Tamura K, Nei M (1993) Estimation of the number of nucleotide substitutions in the control region of mitochondrial DNA in humans and chimpanzees. *Mol Biol Evol* 10: 512–526.
28. Felsenstein J (1985) Confidence limits on phylogenies: An approach using the bootstrap. *Evolution* 39: 783–791.
29. Tamura K, Dudley J, Nei M, Kumar S (2007) MEGA4: Molecular Evolutionary Genetics Analysis (MEGA) software version 4.0. *Mol Biol Evol* 24: 1596–1599.
30. Bok K, Prikhodko VG, Green KY, Sosnovtsev SV (2009) Apoptosis in murine norovirus-infected RAW264.7 cells is associated with downregulation of survivin. *J Virol* 83: 3647–3656.
