# Supplementary material for: Diversity of Murine Norovirus Strains Isolated from Asymptomatic Mice of Different Genetic Backgrounds within a Single U.S. Research Institute
Source: PLoS One. 2011 Jun 28;6(6):e21435. doi: 10.1371/journal.pone.0021435 (PMC3125191; doi:10.1371/journal.pone.0021435)
Supplement: Table S1 — Murine norovirus strains included in phylogenetic analysis and their GenBank accession numbers are shown. (XLSX) [file pone.0021435.s001.xlsx]

## Sheet: Sheet1
Supplementary Table: Murine Norovirus Strains in Phylogenetic Analysis
Murine Norovirus Strain	GenBank Accession Number
Mu/NoV/GV/NIH- 2409/2005 /US	JF320644
Mu/NoV/GV/NIH -2410/2005 /US	JF320645
Mu/NoV/GV/NIH- 2411/2005 /US	JF320646
Mu/NoV/GV/NIH- 2747/2005 /US	JF320647
Mu/NoV/GV/NIH- 2750/2005 /US	JF320648
Mu/NoV/GV/NIH -4421/2005 /US	JF320649
Mu/NoV/GV/NIH -4428/2005 /US	JF320650
Mu/NoV/GV/NIH-4431/2005 /US	JF320651
Mu/NoV/GV/NIH -A114/2006/US	JF320652
Mu/NoV/GV/NIH-D220/2007/US	JF320653
Mu/NoV/GV/MNV-1/2002/US	AY228235
Mu/NoV/GV/ MNV1CW12002/US	DQ285629
Mu/NoV/GV/MNV1CW2/2002/US	EU004654
Mu/NoV/GV/ MNV1CW3/2002/US	EF014462
Mu/NoV/GV/MNV1CW4/2002/US	EU004655
Mu/NoV/GV/ MNV1CW5/2002/US	EU004656
Mu/NoV/GV/MNV1CW6/2002/US	EU004657
Mu/NoV/GV/MNV1CW7/2002/US	EU004658
Mu/NoV/GV/MNV1CW8/2002/US	EU004659
Mu/NoV/GV/ MNV1CW9/2002/US	EU004660
Mu/NoV/GV/ MNV1CW10/2002/US	EU004661
Mu/NoV/GV/MNV1CW11/2002/US	EU004662
Mu/NoV/GV/ WU11/2005/US	EU004663
Mu/NoV/GV/ WU12/2005/US	EU004664
Mu/NoV/GV/WU20/2005/US	EU004665
Mu/NoV/GV/WU21/2005/US	EU004666
Mu/NoV/GV/WU22/2005/US	EU004667
Mu/NoV/GV/ WU23/2005/US	EU004668
Mu/NoV/GV/WU24/2005/US	EU004669
Mu/NoV/GV/ WU25 /2005/US	EU004670
Mu/NoV/GV/WU26/2005/US	EU004671
Mu/NoV/GV/CR1/2005/US	EU004672
Mu/NoV/GV/ CR3/2005/US	EU004673
Mu/NoV/GV/CR4/2005/US	EU004674
Mu/NoV/GV/CR5/2005/US	EU004675
Mu/NoV/GV/CR6/2005/US	EU004676
Mu/NoV/GV/CR7/2005/US	EU004677
Mu/NoV/GV/CR10/2005/US	EU004678
Mu/NoV/GV/CR11/2005/US	EU004679
Mu/NoV/GV/CR13/2005/US	EU004680
Mu/NoV/GV/CR15/2005/US	EU004681
Mu/NoV/GV/CR17/2005/US	EU004682
Mu/NoV/GV/CR18/2005/US	EU004683
Mu/NoV/GV/ MNV2/2005/US	DQ223041
Mu/NoV/GV/MNV3 /2005/US	DQ223042
Mu/NoV/GV/MNV4/2005/US	DQ223043
Mu/NoV/GV/S7-P2/2005/JP	AB435514
Mu/NoV/GV S7-PP3/2005/JP	AB435515
Mu/NoV/GV/ M21/2006/DE	DQ911368
Mu/NoV/GV/S36/2006/DE	EF531290
Mu/NoV/GV/S99 /2006/DE	EF531291
Mu/NoV/GV/S18/2007/SK	FJ446719
Mu/NoV/GV/K4 /2007/SK	FJ446720
Mu/NoV/GV/Hannover/2007/DE	EU854589
